# Supplementary material for: Transcriptome and Metabolome Analysis of Color Changes during Fruit Development of Pepper (Capsicum baccatum)
Source: MDPI journal article supplement (doi:10.3390/ijms232012524), 2022-10-19
Supplement: s1 [file s1]

**Supplementary Table S9 Transcriptome sequencing quality analysis**

| <b>Sample</b> | <b>Raw reads</b> | <b>Clean reads</b> | <b>Total map</b> | <b>Error rate</b> | <b>Q20</b> | <b>Q30</b> | <b>GC%</b> |
|---------------|------------------|--------------------|------------------|-------------------|------------|------------|------------|
| CbW-1         | 43339624         | 41387756           | 37889927(91.55%) | 0.02              | 98.34      | 94.82      | 42.12      |
| CbW-2         | 41186554         | 42549580           | 38926046(91.48%) | 0.02              | 98.41      | 95         | 42.19      |
| CbW-3         | 40288266         | 40284866           | 34903530(86.64%) | 0.02              | 98.68      | 95.67      | 42.05      |
| CbY-1         | 45103418         | 41531132           | 35532176(85.56%) | 0.02              | 98.32      | 94.73      | 42.33      |
| CbY-2         | 40894570         | 39294524           | 27882879(70.96%) | 0.02              | 98.32      | 94.74      | 42.29      |
| CbY-3         | 43796848         | 39886958           | 36282137(90.96%) | 0.02              | 98.53      | 95.29      | 42         |
| CbO-1         | 43432696         | 41415936           | 39898628(96.34%) | 0.02              | 98.27      | 94.6       | 41.86      |
| CbO-2         | 43864854         | 39348806           | 35130573(89.28%) | 0.03              | 97.98      | 93.74      | 41.93      |
| CbO-3         | 41319840         | 39171874           | 36816168(93.99%) | 0.02              | 98.19      | 94.38      | 42.09      |
| CbR-1         | 43612032         | 42718356           | 40296462(94.33%) | 0.02              | 98.43      | 95.02      | 41.99      |
| CbR-2         | 40967666         | 39342468           | 37709807(95.85%) | 0.02              | 98.41      | 94.9       | 42.11      |
| CbR-3         | 41169508         | 41514282           | 34344523(82.73%) | 0.02              | 98.18      | 94.42      | 41.61      |
